# Supplementary material
Source: publisher figshare collection journal article supplement (https://acs.figshare.com/ndownloader/files/4047106)
Supplement: Supplementary file 1 [file 4047106]

# Supporting Information

for the paper

## Multifunctionality of Crystalline M1 MoV(TeNb) Oxide Catalysts in Selective Oxidation of Propane and Benzyl Alcohol

*Kazuhiko Amakawa,<sup>†</sup> Yury V. Kolen'ko,<sup>†,‡</sup> Alberto Villa,<sup>§</sup> Manfred Schuster,<sup>†</sup>*

*Lénárd-István Csepei,<sup>†</sup> Gisela Weinberg,<sup>†</sup> Sabine Wrabetz,<sup>†</sup> Raoul Naumann d'Alnoncourt,<sup>†</sup>*

*Frank Girgsdies,<sup>†</sup> Laura Prati<sup>§</sup>, Robert Schlögl,<sup>†</sup> and Annette Trunschke<sup>\*†</sup>*

<sup>†</sup>*Department of Inorganic Chemistry, Fritz Haber Institute of the Max Planck Society,  
Faradayweg 4-6, 14195 Berlin, Germany*

<sup>§</sup>*Department of Inorganic Chemistry, University of Milan, Via Venezian 21, I-20133 Milan, Italy*

<sup>†</sup>*Fax: +49-30-8413-4405; Tel: +49-30-8413-4457; E-mail: [trunschke@fhi-berlin.mpg.de](mailto:trunschke@fhi-berlin.mpg.de)*

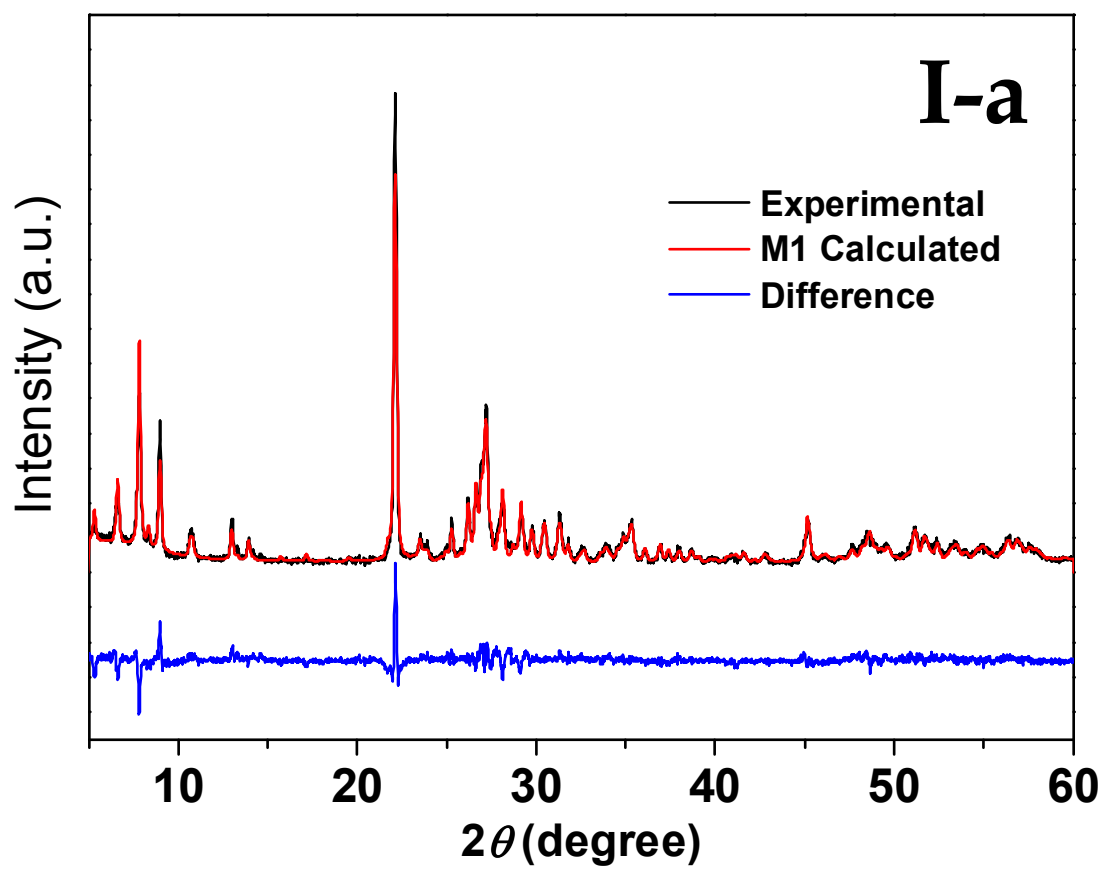

**Figure S1.** Results of the Rietveld refinement of the powder XRD data for catalyst **I-a**.

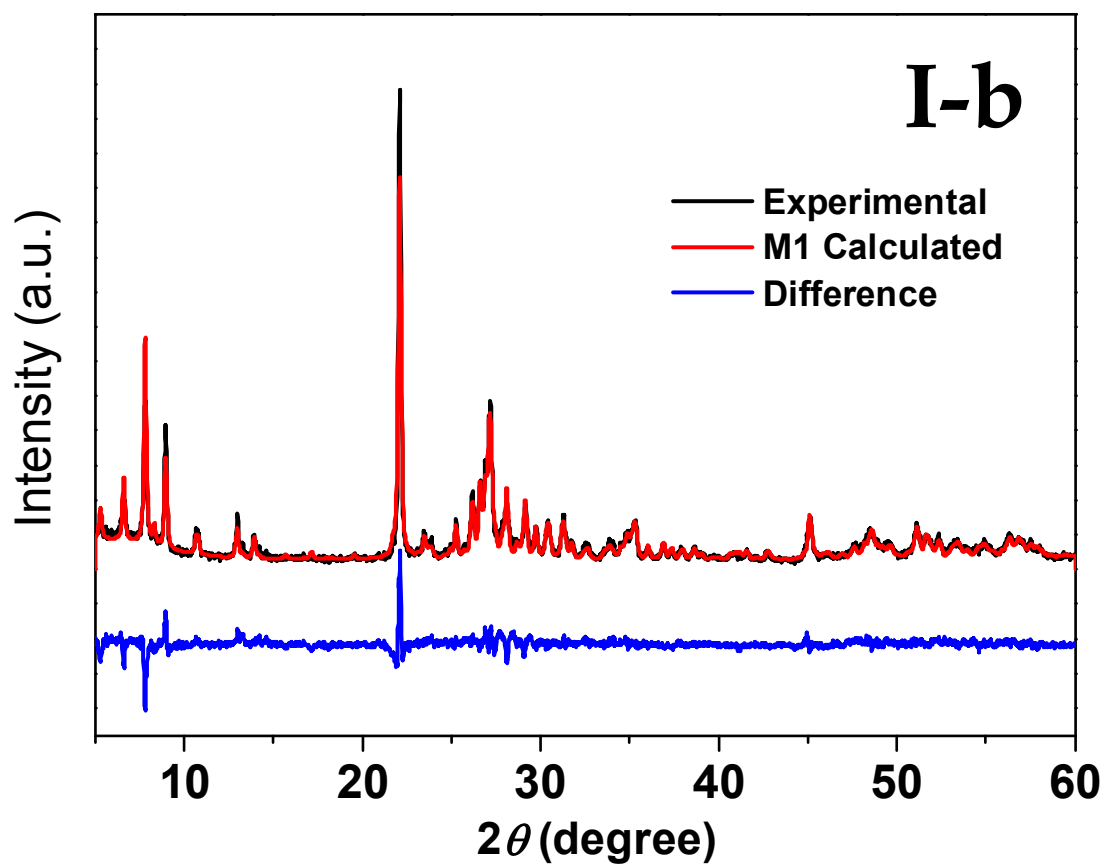

**Figure S2.** Results of the Rietveld refinement of the powder XRD data for catalyst **I-b**.

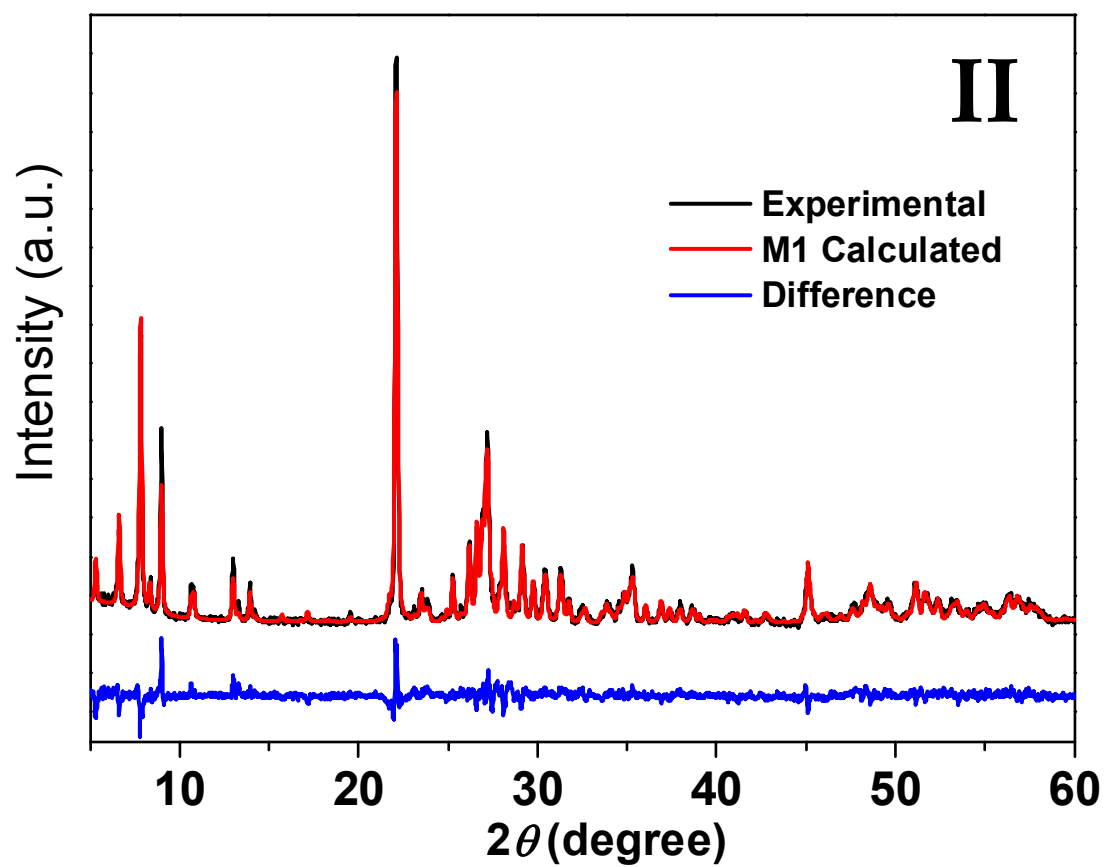

**Figure S3.** Results of the Rietveld refinement of the powder XRD data for catalyst **II**.

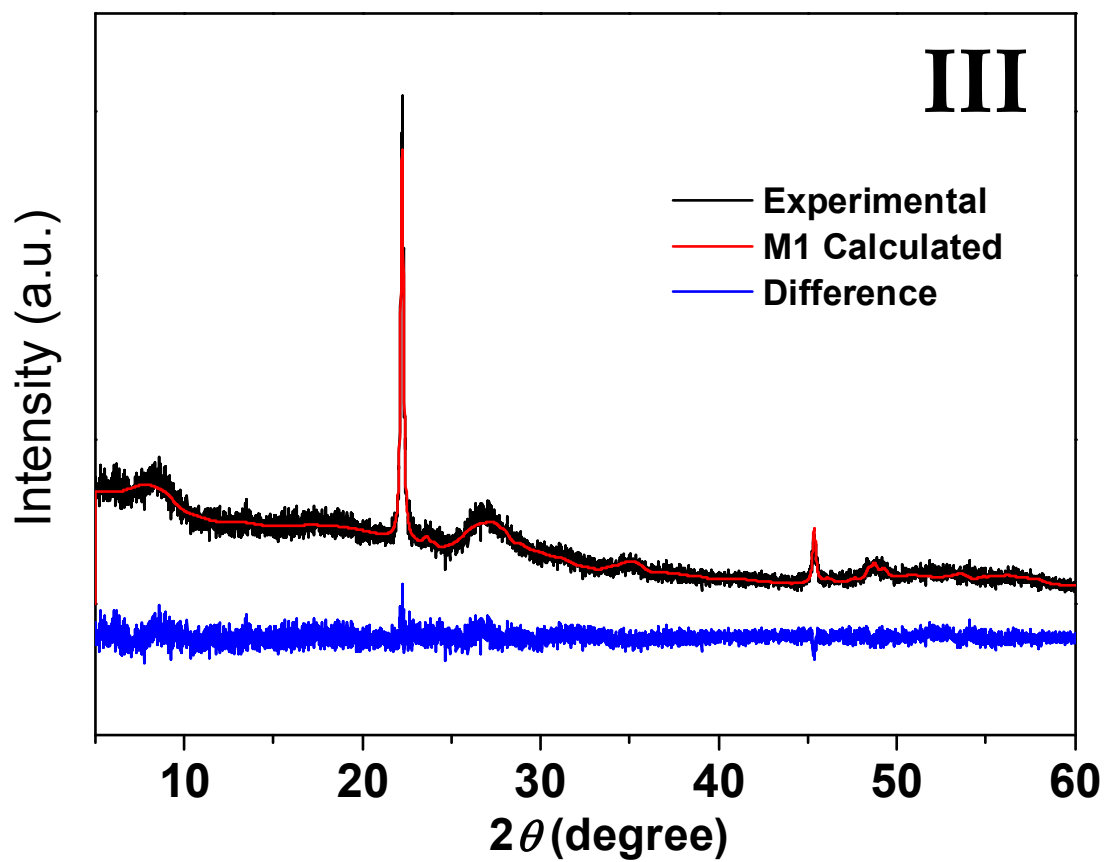

**Figure S4.** Results of the Rietveld refinement of the powder XRD data for catalyst **III**.

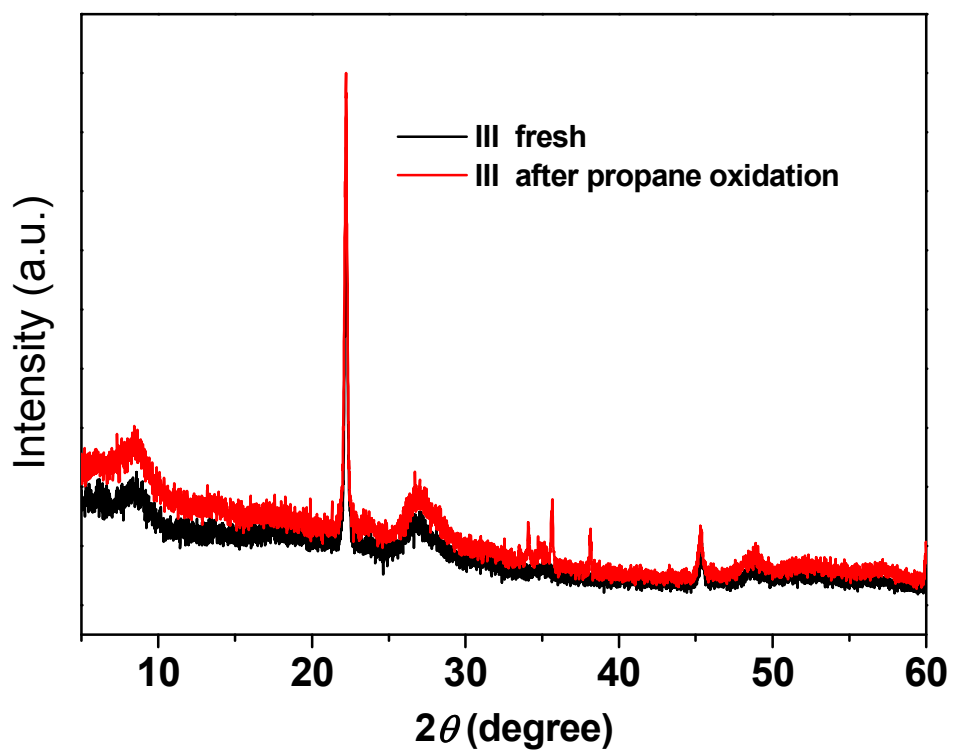

**Figure S5.** XRD patterns of catalyst **III** before and after propane oxidation. Note that the reflections at around 35° are due to the contamination of silicon carbide used as a diluent in the catalytic test.
